# Supplementary material for: A Comprehensive Analysis of the Colonic Flora Diversity, Short Chain Fatty Acid Metabolism, Transcripts, and Biochemical Indexes in Heat-Stressed Pigs
Source: PubMed Central journal article supplement (PMC8567839; doi:10.3389/fimmu.2021.717723), 2021-10-21

| Name   | sample No.                   | conc.<br>(ng/ul) | volu.<br>(ul) | weight<br>(ug) | QC result<br>* | Margin of<br>Sample | Unavailable<br>Cause |
|--------|------------------------------|------------------|---------------|----------------|----------------|---------------------|----------------------|
| C-01-1 | BMK210726-X925-0<br>20001-01 | 2396.1           | 45.0          | 107.8          | A              | Sufficient          |                      |
| C-01-2 | BMK210726-X925-0<br>20002-01 | 1658.9           | 45.0          | 74.7           | A              | Sufficient          |                      |
| C-01-3 | BMK210726-X925-0<br>20003-01 | 2223.9           | 45.0          | 100.1          | A              | Sufficient          |                      |
| C-01-4 | BMK210726-X925-0<br>20004-01 | 2052.7           | 45.0          | 92.4           | C              | Sufficient          | Integrity            |
| C-07-1 | BMK210726-X925-0<br>20005-01 | 1472.5           | 35.0          | 51.5           | C              | Sufficient          | Integrity            |
| C-07-2 | BMK210726-X925-0<br>20006-01 | 1898.1           | 45.0          | 85.4           | C              | No surplus          | Integrity            |
| C-07-3 | BMK210726-X925-0<br>20007-01 | 1041.6           | 27.0          | 28.1           | C              | No surplus          | Integrity            |
| C-07-4 | BMK210726-X925-0<br>20008-01 | 2194.7           | 45.0          | 98.8           | A              | Sufficient          |                      |
| C-14-1 | BMK210726-X925-0<br>20009-01 | 2480.9           | 55.0          | 136.4          | C              | Sufficient          | Integrity            |
| C-14-2 | BMK210726-X925-0<br>20010-01 | 1880.3           | 22.0          | 41.4           | C              | Sufficient          | Integrity            |
| C-14-3 | BMK210726-X925-0<br>20011-01 | 1361.5           | 45.0          | 61.3           | A              | Sufficient          |                      |
| C-14-4 | BMK210726-X925-0<br>20012-01 | 2222.0           | 45.0          | 100.0          | C              | Insufficient        | Integrity            |
| C-21-1 | BMK210726-X925-0<br>20013-01 | 1607.0           | 22.0          | 35.4           | C              | Insufficient        | Integrity            |
| C-21-2 | BMK210726-X925-0<br>20014-01 | 2806.5           | 45.0          | 126.3          | A              | Sufficient          |                      |
| C-21-3 | BMK210726-X925-0<br>20015-01 | 1710.4           | 45.0          | 77.0           | A              | Insufficient        |                      |
| C-21-4 | BMK210726-X925-0<br>20016-01 | 1422.3           | 45.0          | 64.0           | A              | Insufficient        |                      |
|        |                              |                  |               |                |                |                     |                      |

**Note\*:**

The test conclusion is based on the comprehensive evaluation of the tested samples based on the requirements of the Beijing Biomarker sequencing sample test standard;

A: Qualified, the quality meets the requirements of building a database, and the total amount meets 3 times or more of the conventional amount of building a database;

B+: The quality meets the requirements of building a database, and the total amount meets 2 regular volume building of the database

B-: The quality meets the requirements for building a database, and the concentration and total amount are less than the requirements for building a database for 2 times

C: The sample quality does not fully meet the requirements for library construction and sequencing, and the samples that can be built at risk but not guaranteed to meet the contract requirements

D: The sample quality does not completely meet the requirements for library construction and sequencing, and it is not recommended to use samples



## 2、 Peak Graph of Nanodrop

### Result of 2100

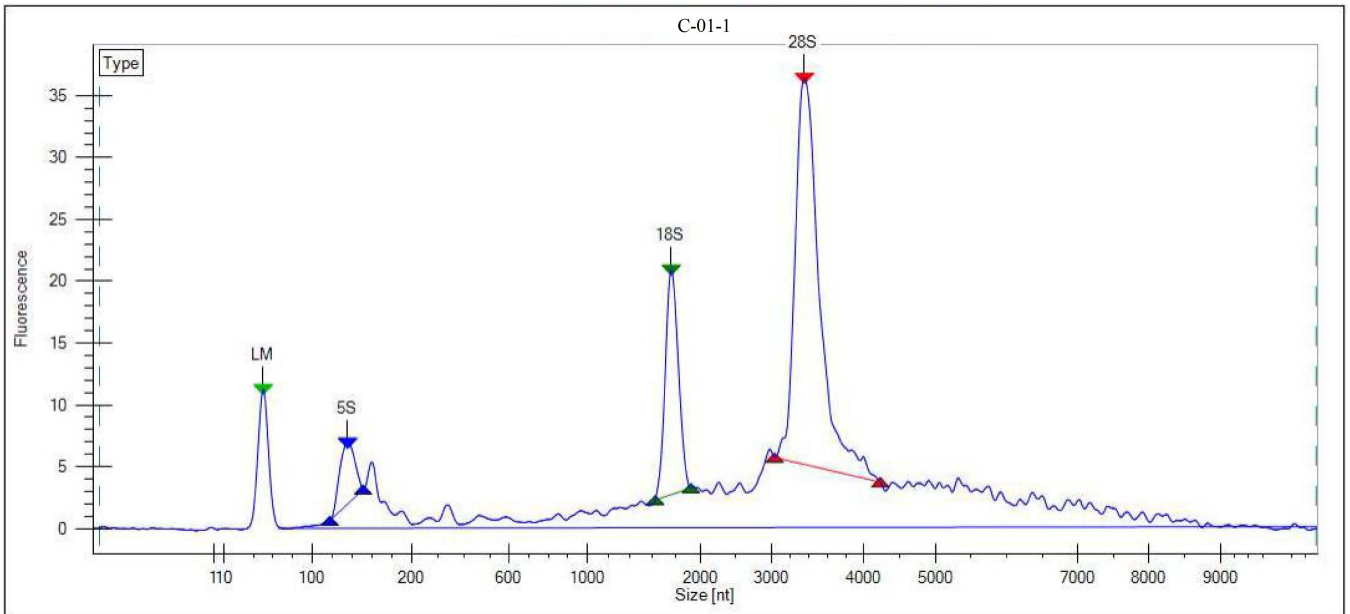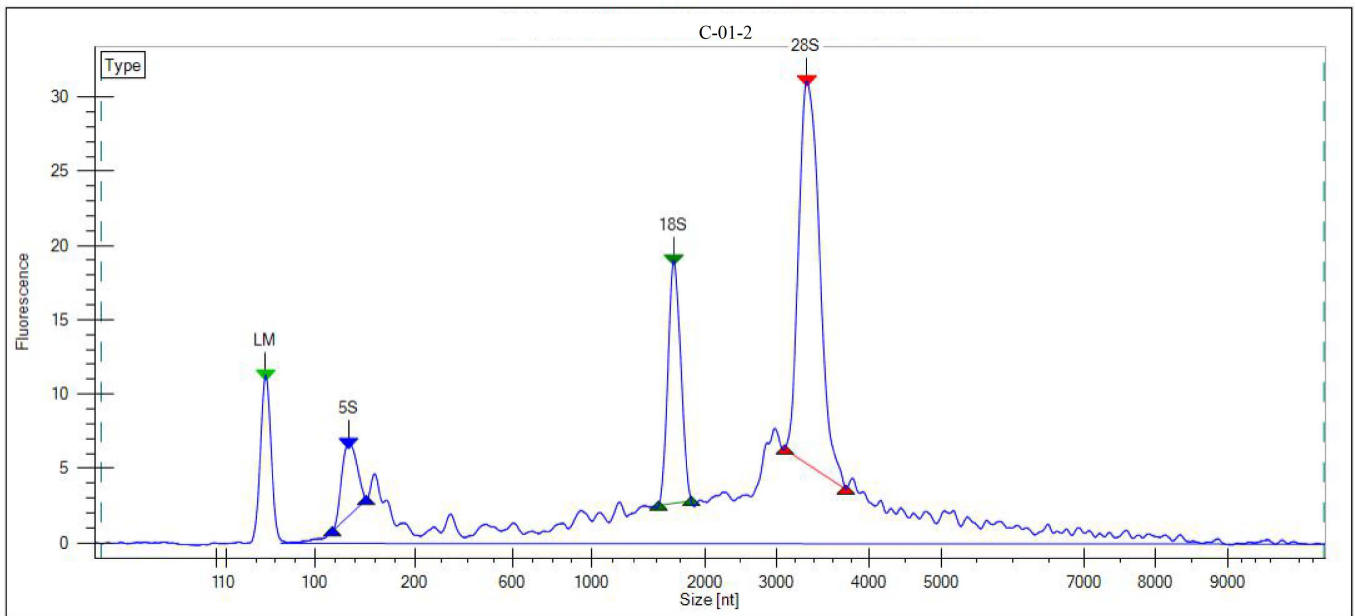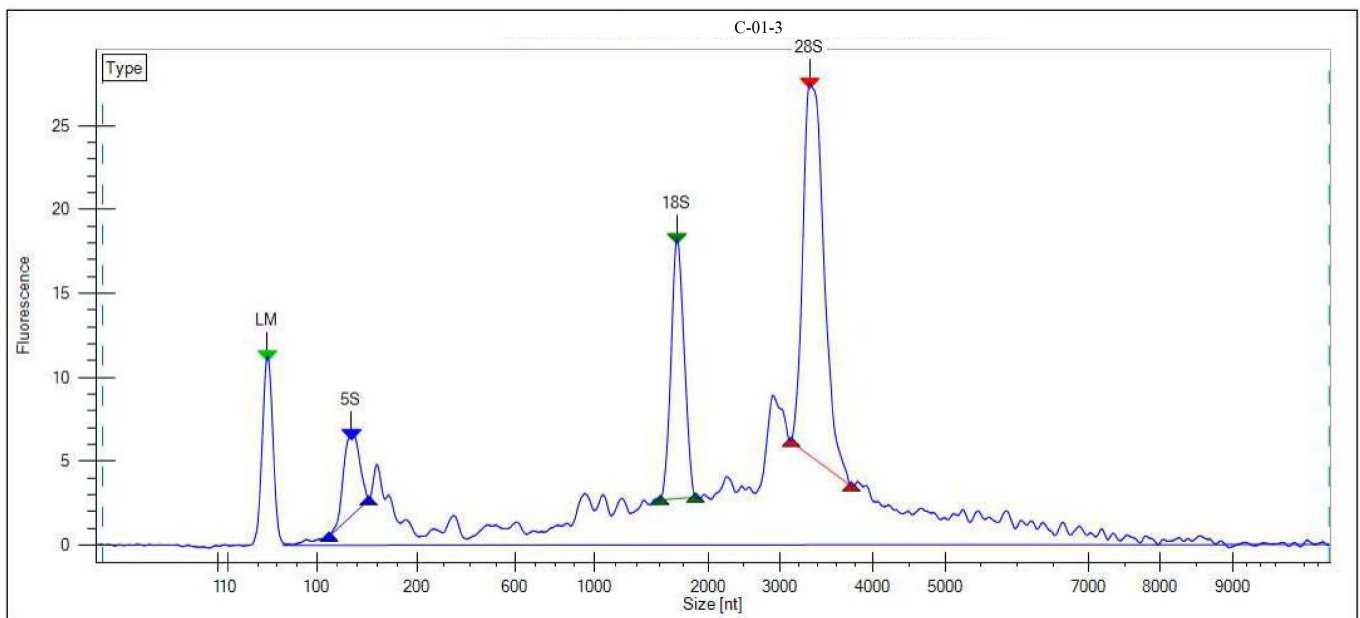

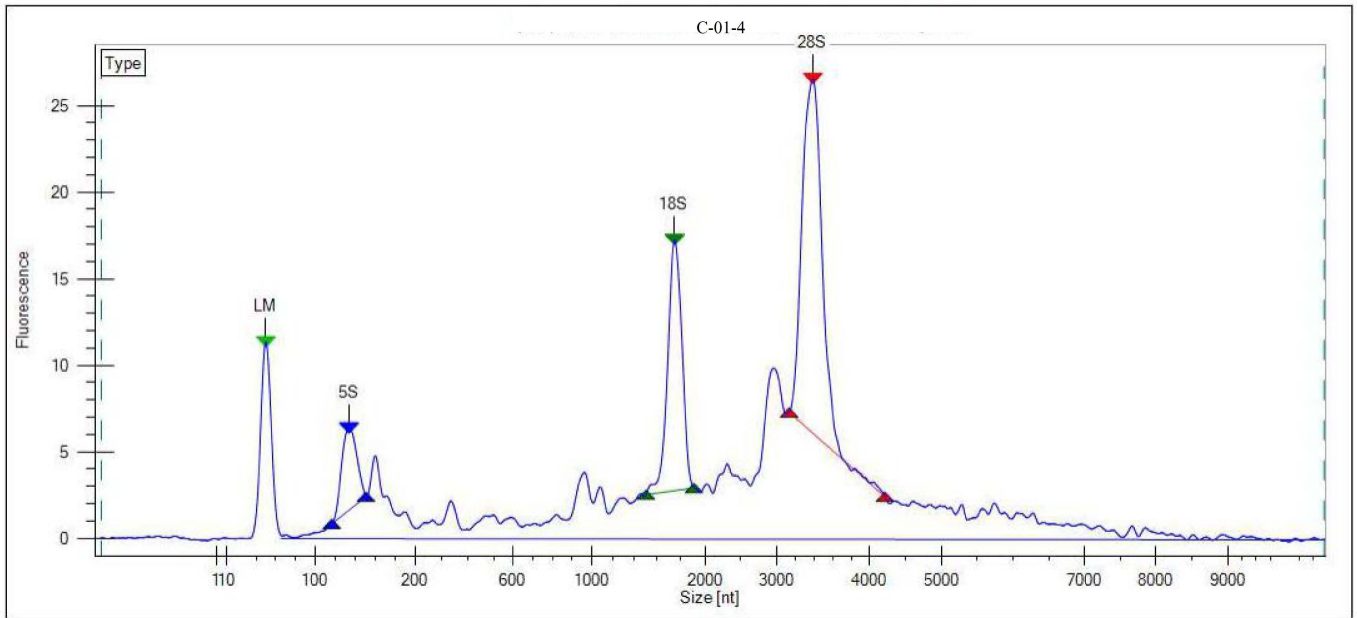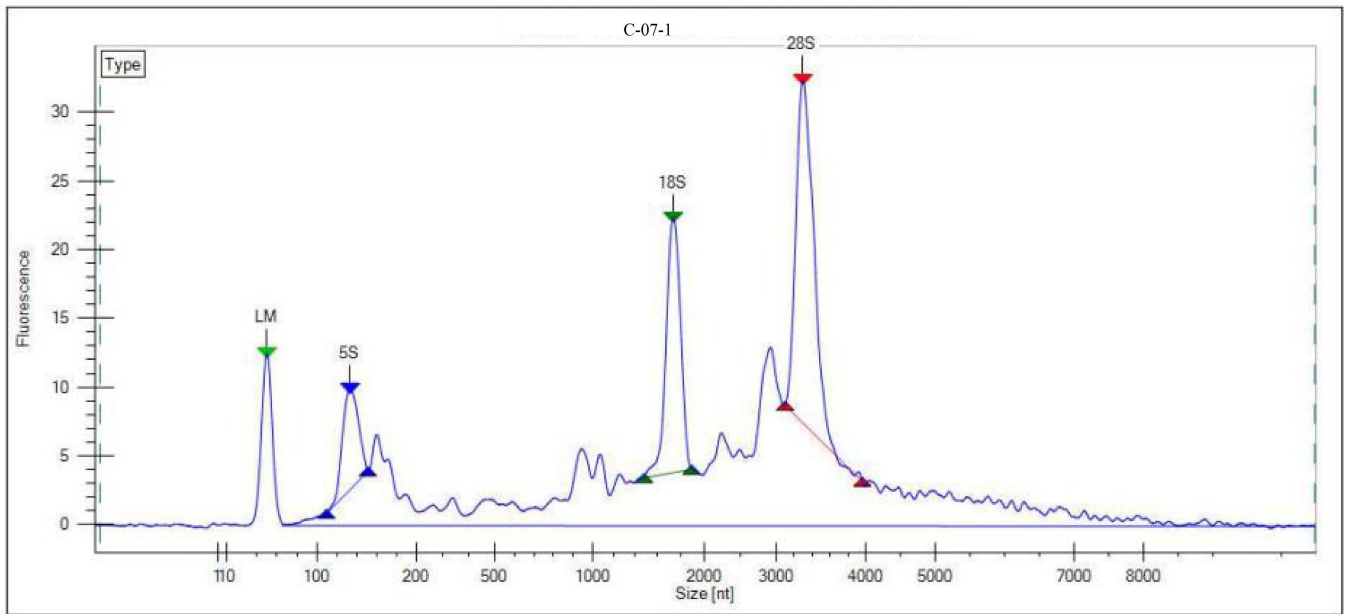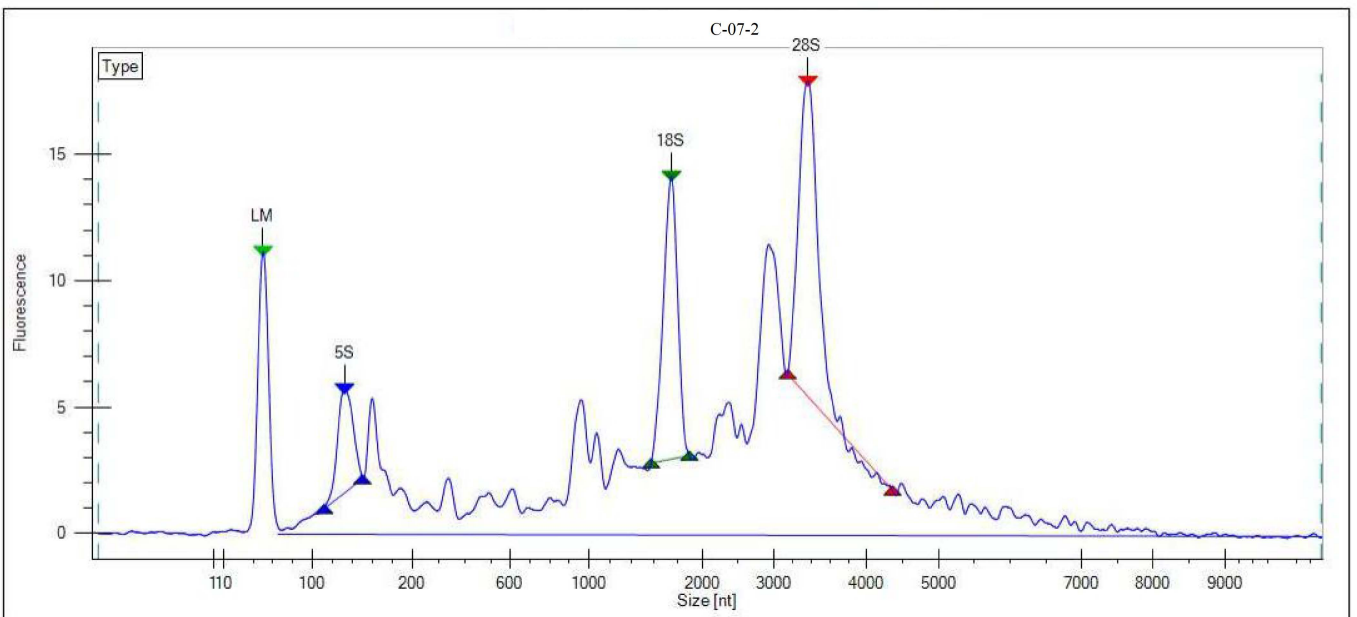

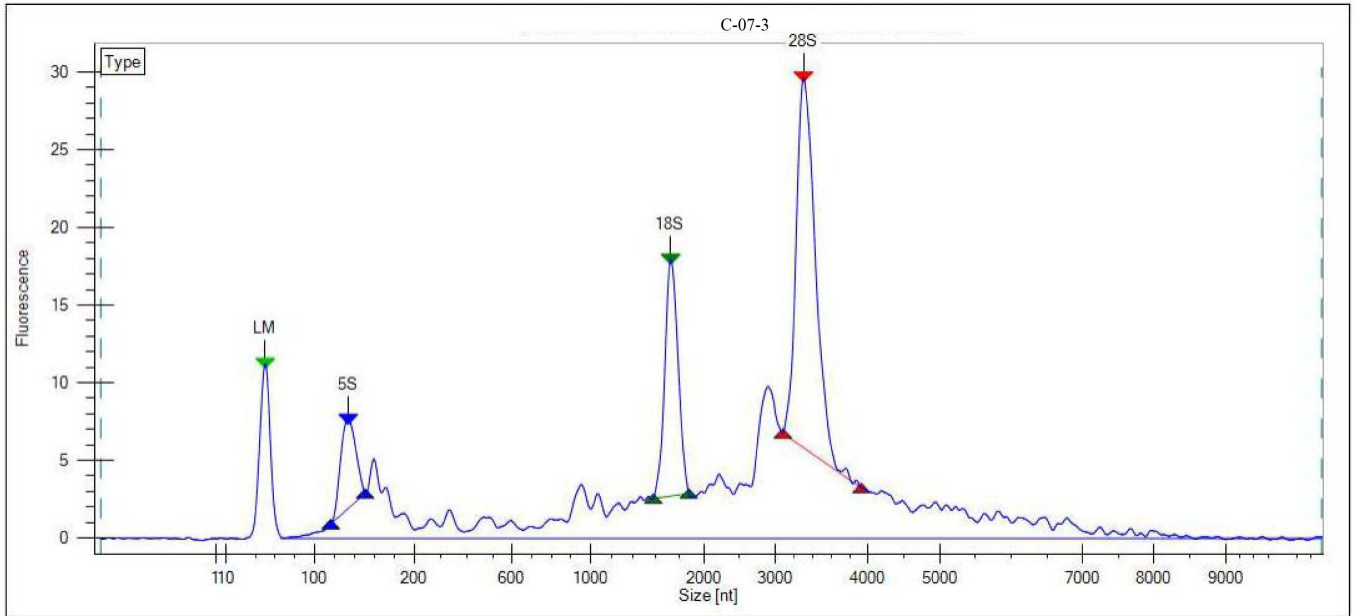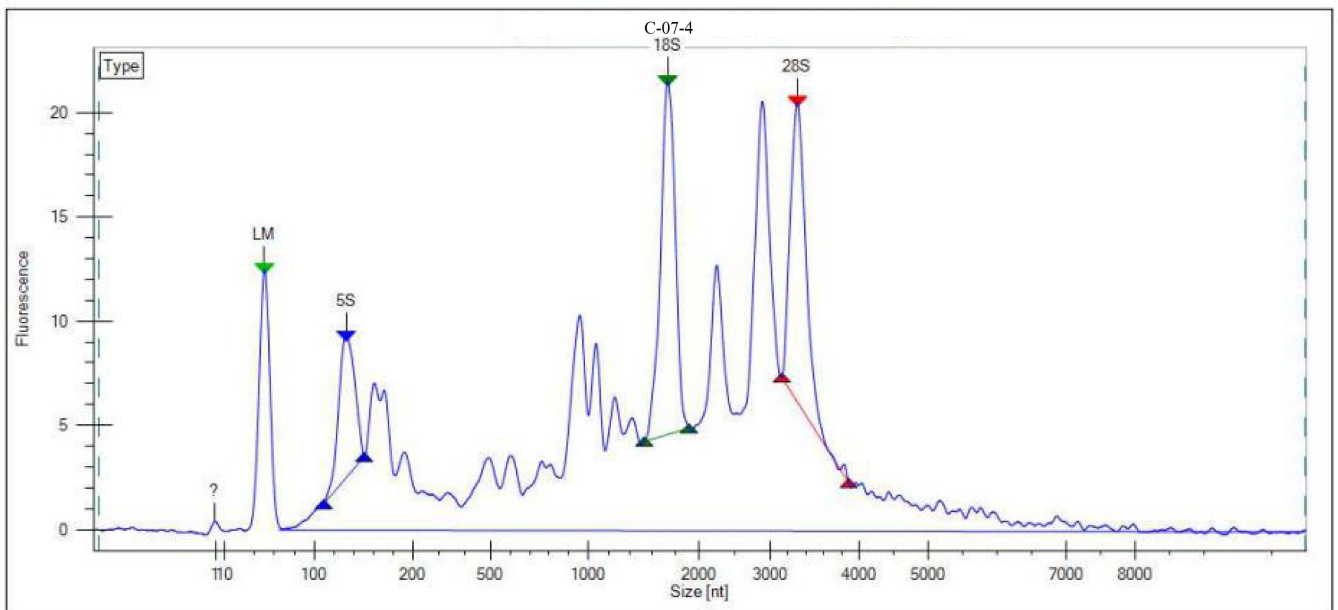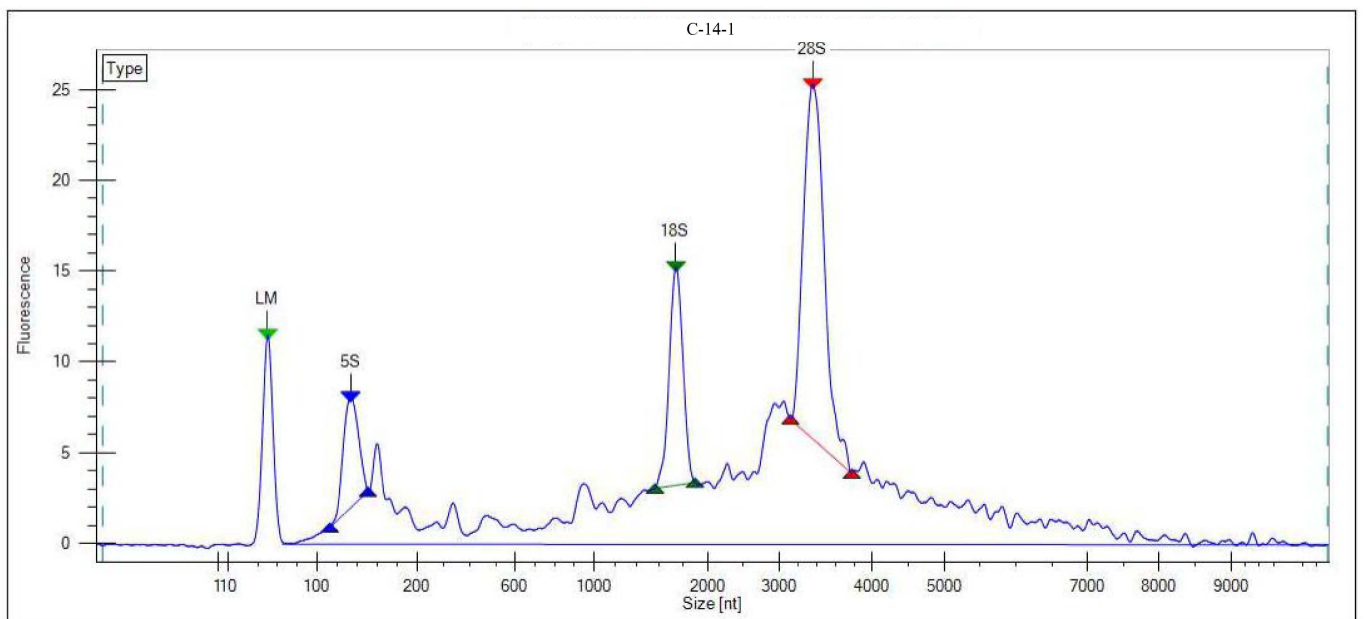

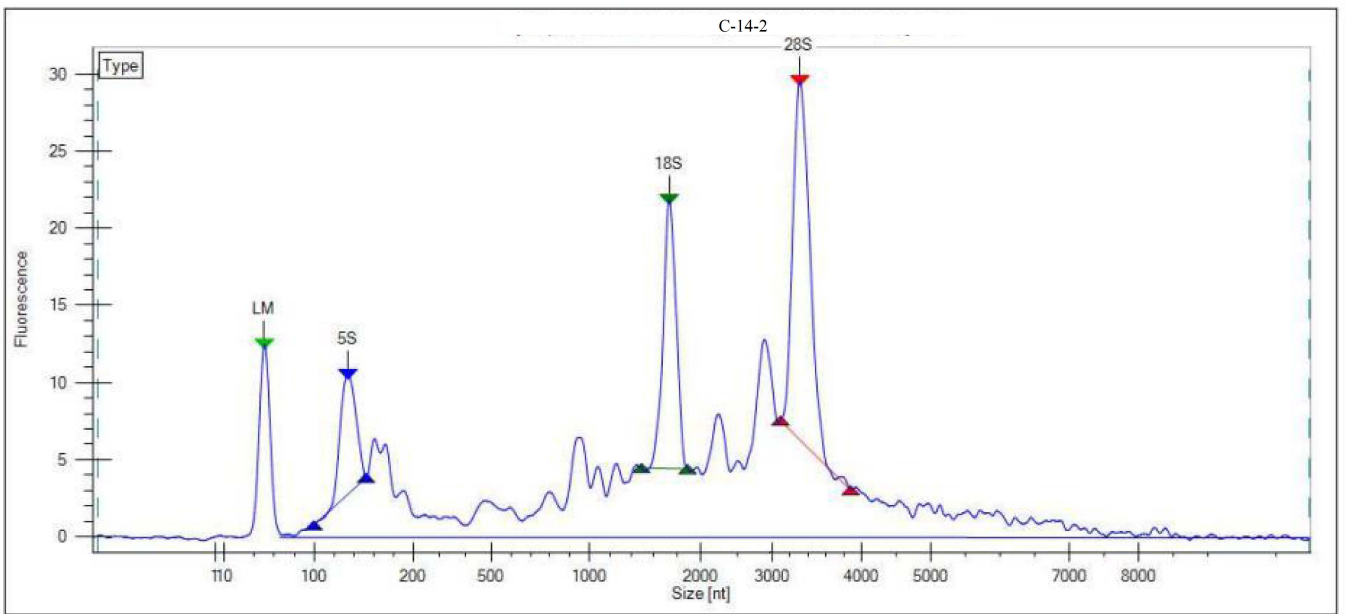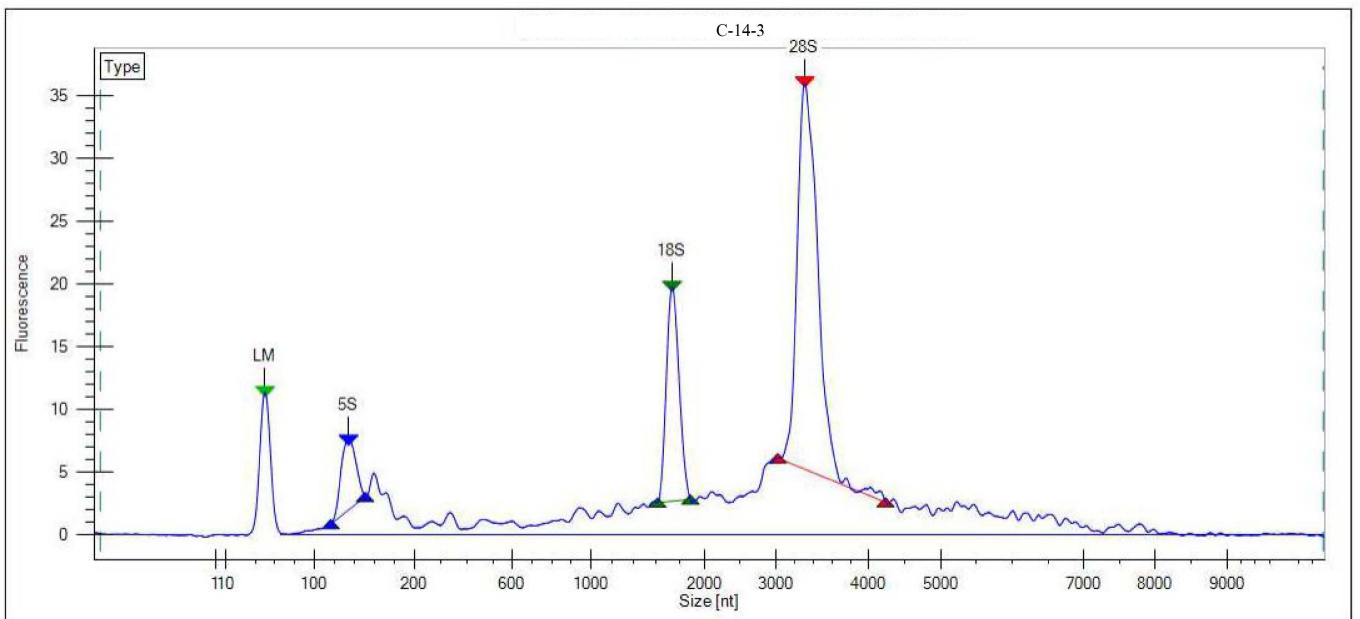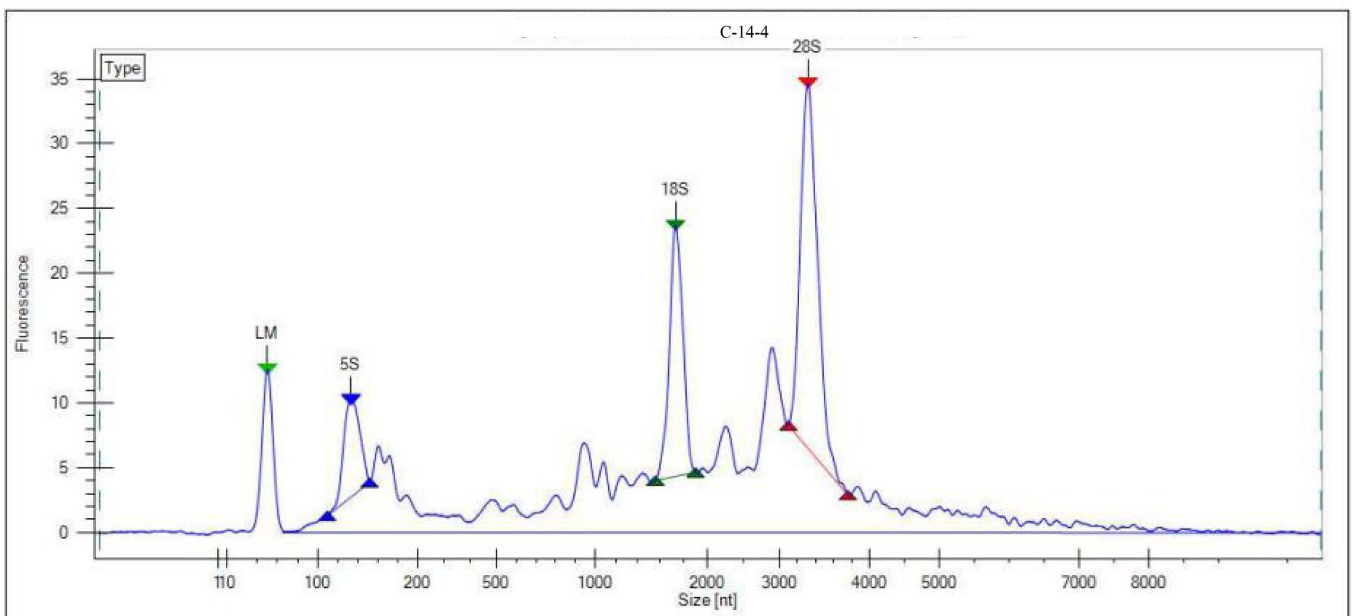



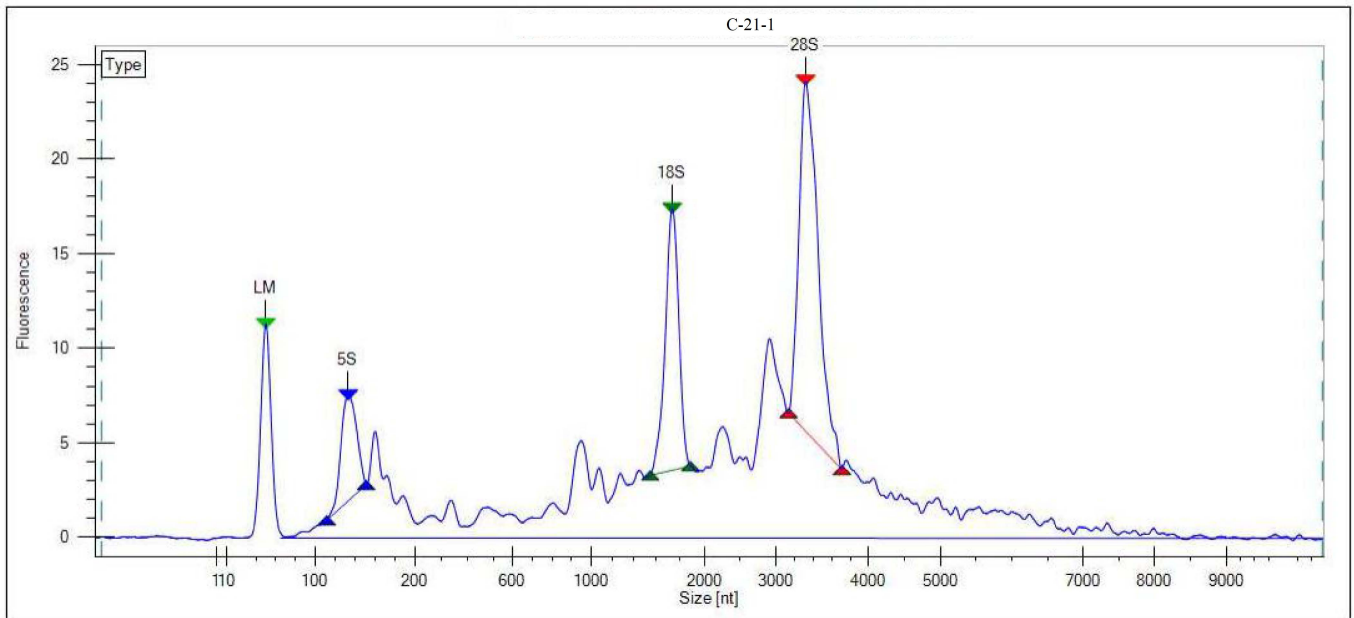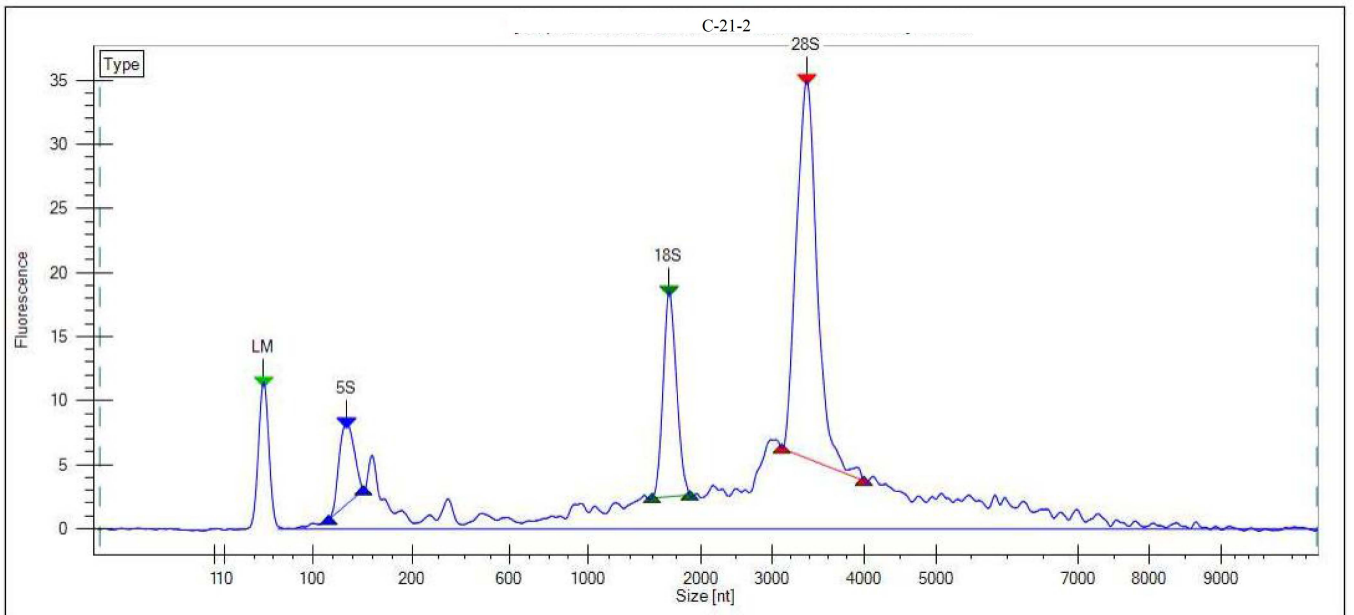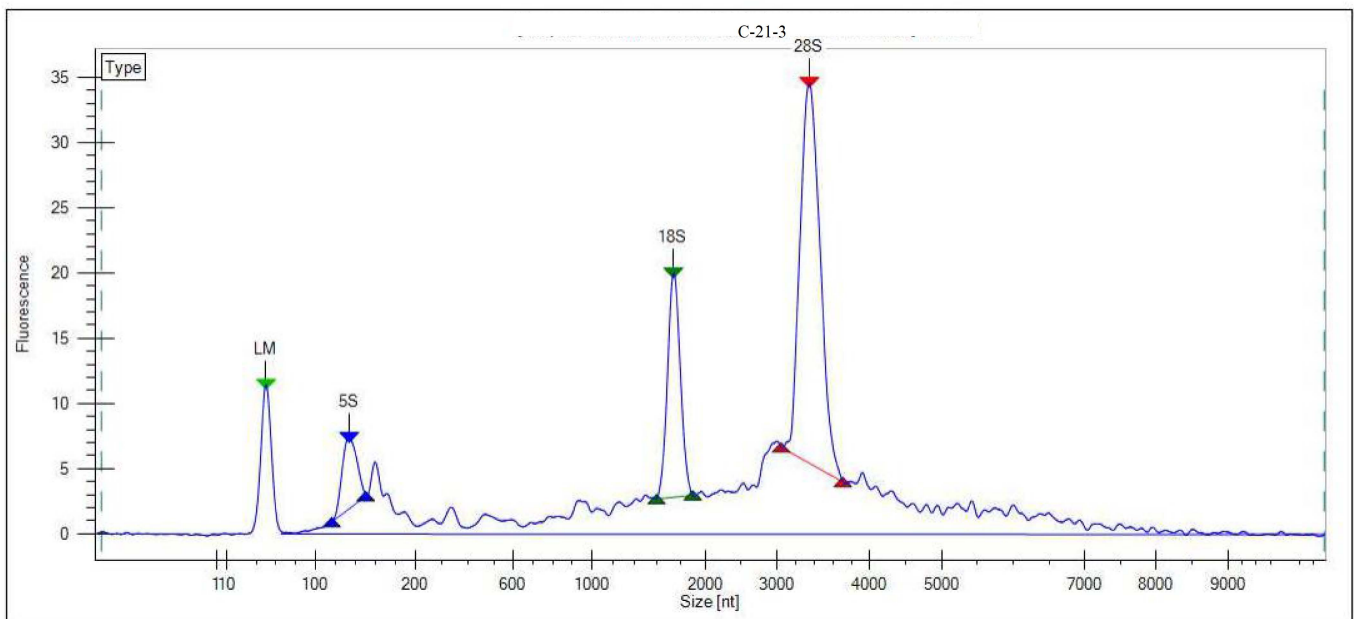

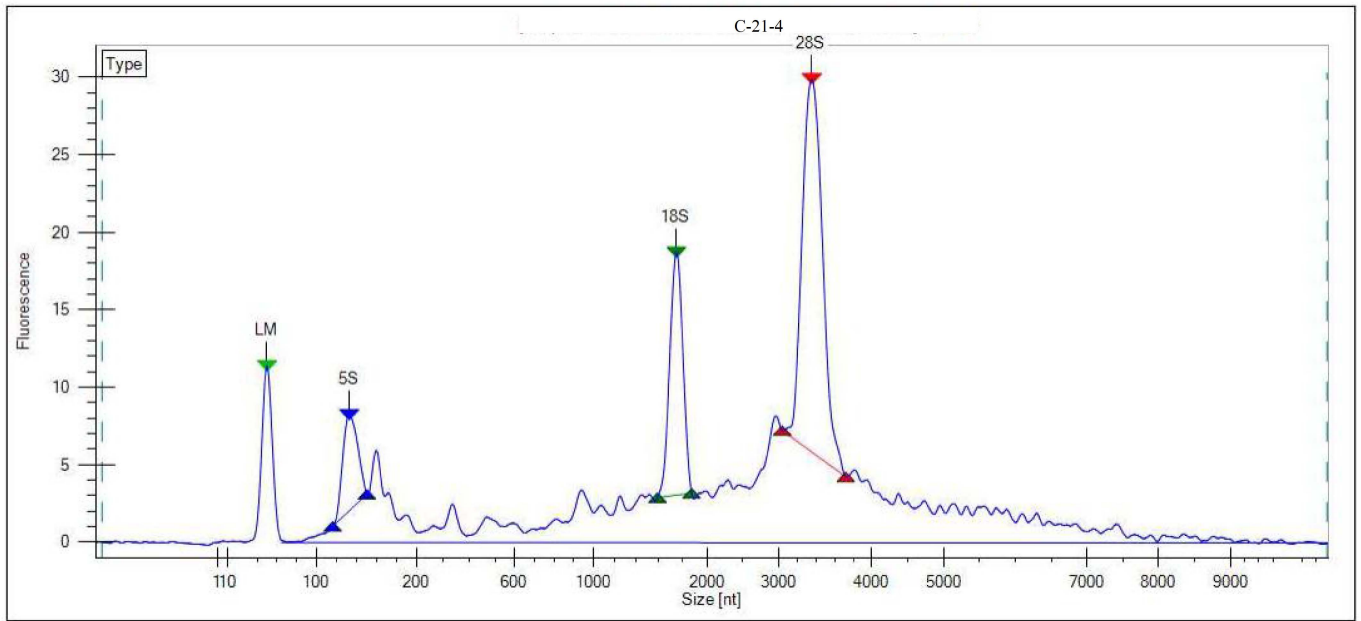

Supplement: DataSheet_2.pdf [file DataSheet_2.pdf]
